# Supplementary material
Source: Copernicus journal article supplement (doi:10.5194/egusphere-2026-2846)
Supplement: Supplementary file 1 [file egusphere-2026-2846-supplement.pdf]

# Supplement for Meteorological normalization of surface ozone variability across warm and cold seasons in China during 2015–2024

Zhenying Ye<sup>1</sup>, Run Liu<sup>1</sup>, Tingting Hu<sup>2,3</sup>, Guoxin Chen<sup>1</sup>, Min Wu<sup>1</sup>

5 <sup>1</sup>College of Environment and Climate, Institute for Environmental and Climate Research, Jinan University, Guangzhou, 511443, China

<sup>2</sup>Fujian Academy of Environmental Sciences, Fuzhou, 350013, China

<sup>3</sup>Fujian Key Laboratory of Environmental Engineering, Fuzhou, 350013, China

*Correspondence to:* Run Liu (liurun@jnu.edu.cn)

10 **Table S1: Classification of major polluted regions and representative cities used in this study**

| Region | Cities                                                                                                                                                                                                                                                                                                                                                                                                                                                                                                           |
|--------|------------------------------------------------------------------------------------------------------------------------------------------------------------------------------------------------------------------------------------------------------------------------------------------------------------------------------------------------------------------------------------------------------------------------------------------------------------------------------------------------------------------|
| NCP    | Beijing, Tianjin, Shijiazhuang, Tangshan, Qinhuangdao, Handan, Xingtai, Baoding, Zhangjiakou, Chengde, Cangzhou, Langfang, Hengshui, Taiyuan, Datong, Shuozhou, Xinzhou, Yangquan, Changzhi, Jincheng, Jinan, Qingdao, Zibo, Zaozhuang, Dongying, Weifang, Jining, Taian, Rizhao, Linyi, Dezhou, Liaocheng, Binzhou, Heze, Zhengzhou, Kaifeng, Pingdingshan, Anyang, Hebi, Xinxiang, Jiaozuo, Puyang, Xuchang, Luohe, Nanyang, Shangqiu, Xinyang, Zhoukou, Zhumadian, Hohhot, Baotou, Chaoyang, Jinzhou, Huludao |
| YRD    | Shanghai, Nanjing, Wuxi, Xuzhou, Changzhou, Suzhou, Nantong, Lianyungang, Huai'an, Yancheng, Yangzhou, Zhenjiang, Taizhou, Suqian, Hangzhou, Ningbo, Jiaxing, Huzhou, Shaoxing, Zhoushan, Hefei, Wuhu, Bengbu, Huainan, Ma'anshan, Huaibei, Chuzhou, Fuyang, Suzhou, Lu'an, Bozhou                                                                                                                                                                                                                               |
| PRD    | Guangzhou, Shenzhen, Zhuhai, Foshan, Jiangmen, Zhaoqing, Huizhou, Dongguan, Zhongshan                                                                                                                                                                                                                                                                                                                                                                                                                            |
| FWP    | Lvliang, Jinzhong, Linfen, Yuncheng, Luoyang, Sanmenxia, Xi'an, Tongchuan, Baoji, Xianyang, Weinan                                                                                                                                                                                                                                                                                                                                                                                                               |
| SCB    | Chongqing, Chengdu, Zigong, Luzhou, Deyang, Mianyang, Suining, Neijiang, Leshan, Meishan, Yibin, Ya'an, Ziyang, Nanchong, Guang'an, Dazhou                                                                                                                                                                                                                                                                                                                                                                       |

**Table S2: ERA5 meteorological variables and daily aggregation periods used in this study**

| Variable | Description                                             | Averaging Period  |
|----------|---------------------------------------------------------|-------------------|
| T2M      | 2 meter temperature (K)                                 | 06:00-18:00       |
| SSRD     | Surface solar radiation downwards ( $\text{J m}^{-2}$ ) | 06:00-18:00       |
| TCC      | Total cloud cover (dimensionless)                       | 06:00-18:00       |
| BLH      | Boundary layer height (m)                               | 00:00-12:00       |
| SP       | Surface pressure (Pa)                                   | 06:00-18:00       |
| V10      | 10 meter wind v component ( $\text{m s}^{-1}$ )         | 06:00-12:00       |
| U10      | 10 meter wind u component ( $\text{m s}^{-1}$ )         | 06:00-12:00       |
| RH       | Relative humidity (%)                                   | 06:00-18:00       |
| TP       | Total precipitation (m)                                 | 06:00-18:00 (sum) |

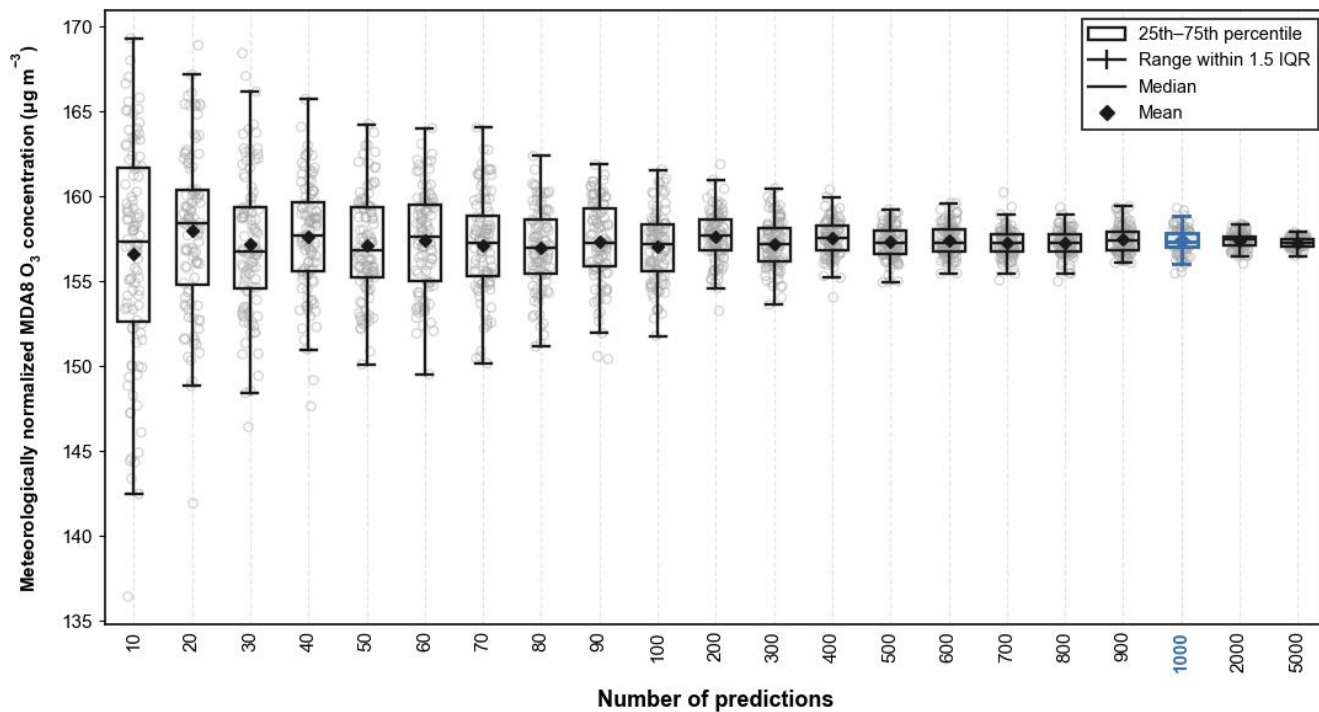

15 Figure S1: Sensitivity of meteorologically normalized MDA8 O<sub>3</sub> concentrations to the number of predictions. Boxplots represent the results from 100 repeated meteorological-normalization calculations for site 1001A in Beijing on 1 July 2021, with the number of predictions varying from 10 to 5000.

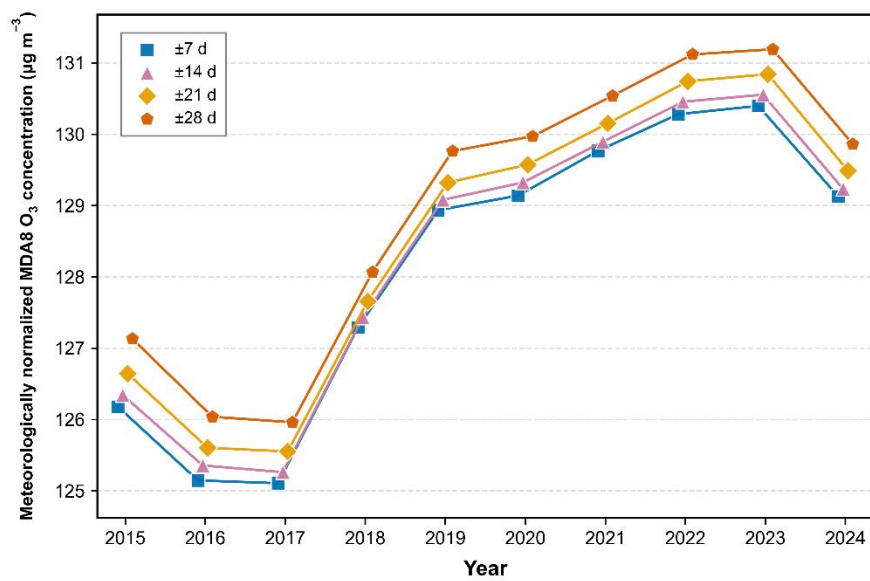

**Figure S2: Sensitivity of meteorologically normalized MDA8 O<sub>3</sub> concentrations to the sliding-window width. Coloured markers represent the meteorologically normalized concentrations obtained using ±7, ±14, ±21, and ±28 d sampling windows.**

20
